# Supplementary material for: LDHA-mediated ROS generation in chondrocytes is a potential therapeutic target for osteoarthritis
Source: PubMed Central journal article supplement (PMC7347613; doi:10.1038/s41467-020-17242-0), 2020-07-09
Supplement: 41467_2020_17242_MOESM1_ESM.pdf [file 41467_2020_17242_MOESM1_ESM.pdf]

## **Supplementary Information**

**LDHA-mediated ROS generation in chondrocytes is a potential therapeutic target for osteoarthritis. Arra et al.**

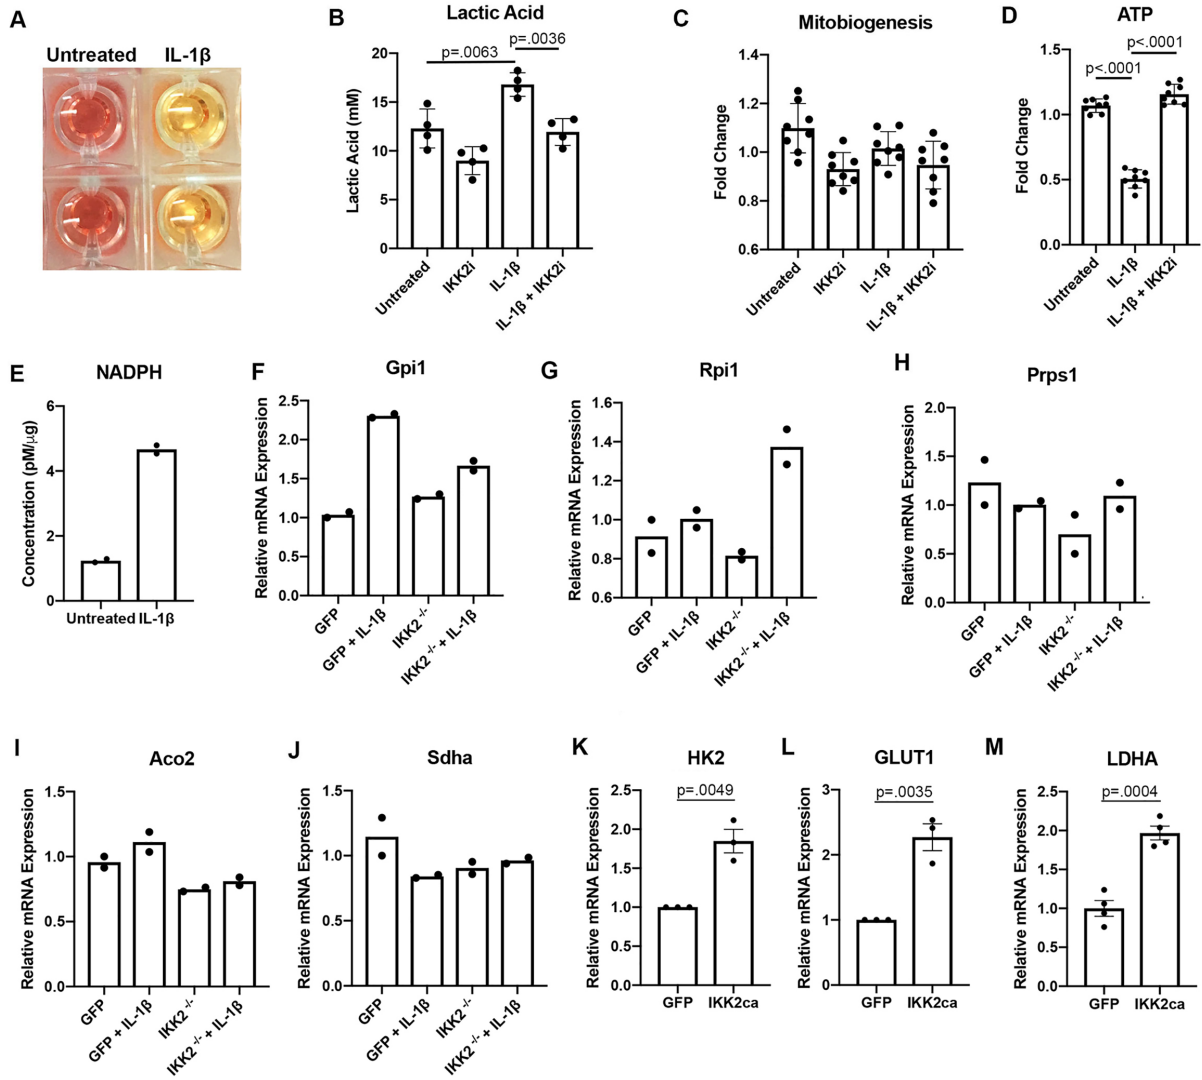

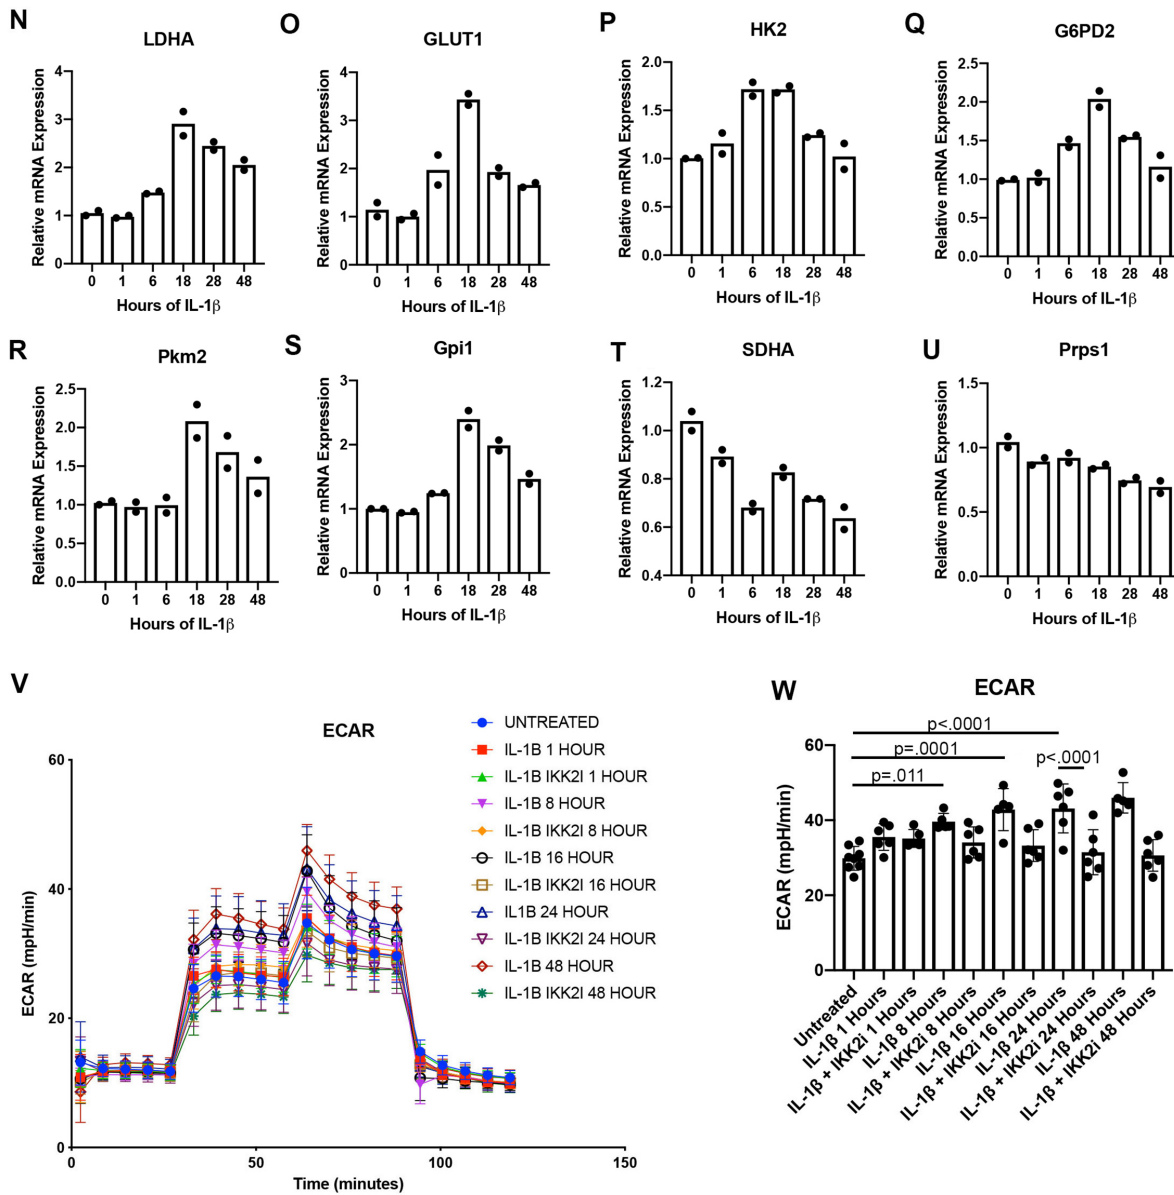

**Supplementary Figure 1. Inflammation promotes aerobic glycolysis in chondrocytes** (A) Representative image of chondrocytes cultured in phenol-red containing media in the presence or absence of IL-1 $\beta$  (10 ng/mL) for 48 hours displaying increased acidification. (B) Primary chondrocytes were treated with IL-1 $\beta$  and/or IKK2i (10  $\mu$ M) for 24 hours. Lactic acid in chondrocyte supernatants was measured in biological replicates from independent experiments, with bars representing mean  $\pm$  S.D for n=4 replicates. (C) Chondrocytes were treated for 24 hours. Biogenesis was measured by comparing the ratio of SDHA to Cox2 protein in cells, normalized to cell number. Graph

displays mean  $\pm$  S.D. with n=8 replicates, representative of one of two experiments. **(D)** ATP levels were measured in chondrocytes treated with IL-1 $\beta$  and/or IKK2i for 48 hours. Data from two experiments, with n=4 samples each. Error bars represent mean  $\pm$  S.D. of n=8 samples. **(E)** Primary chondrocytes were treated with IL-1 $\beta$  (10 ng/mL) for 24 hours. NADPH levels were measured and normalized to protein concentration, with bars representing mean of results from n=2 biologically independent replicates. **(F-J)** IKK2<sup>ff</sup> chondrocytes were infected with adenoviral-GFP, or adenoviral-cre (labeled IKK2<sup>-/-</sup>), then treated with IL-1 $\beta$  (10 ng/mL) for 24 hours. qPCR was performed for Gpi1, Rpi1, Prps1, Aco2, Sdha. Data shown is representative of one experiment out of three, with bar representing mean of technical duplicates. **(K-M)** Chondrocytes were retrovirally transduced with GFP or IKK2ca. 48 hours after transduction, HK2, GLUT1 and LDHA gene expression was measured. Bars represent mean  $\pm$  S.E.M. from n=3 independent experiments. **(N-U)** Primary chondrocytes were treated with IL-1 $\beta$  (10 ng/mL) for various timepoints. Gene expression of LDHA, GLUT1, HK2, G6PD2, PKM2, Gpi1, SDHA, and PRPS1 was measured. Bars are mean of technical replicates, representative of one of two independent experiments. **(V)** Chondrocytes were treated for the indicated timepoints prior to performing seahorse assay. Measurements were performed every 5 minutes with bars representing mean  $\pm$  S.D. for n=6 replicates for each condition, representative of one out of two independent experiments. **(W)** ECAR after oligomycin injection, with bars displaying mean  $\pm$  S.D. from n=6 replicates. (K-M) Two-tailed student's T test. (B-D, W) One-way ANOVA followed by Tukey's multiple comparisons test. P values noted in figure.

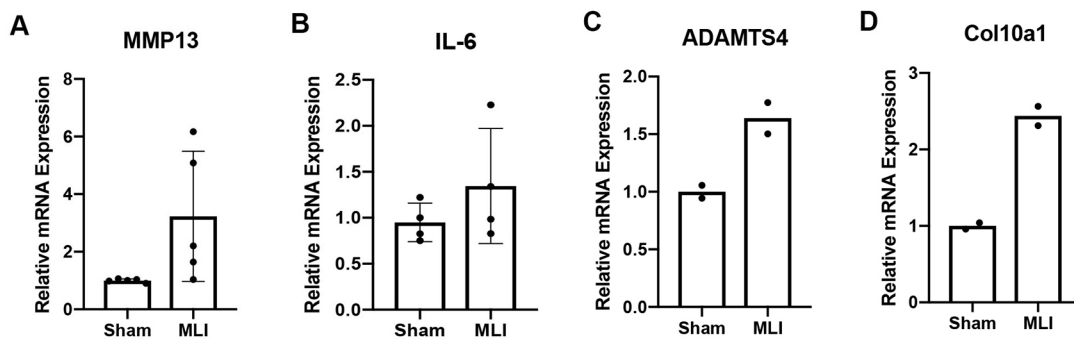

**Supplementary Figure 2. MLI induces expression of catabolic and inflammatory mediators. (A-D)** mRNA was isolated from articular cartilage of MLI compared to sham

joint 4 weeks after MLI surgery. Gene expression analysis for each mouse was performed by qPCR, with bars representing mean  $\pm$  S.D for MMP13 and IL-6. Two-tailed student's T test was utilized for statistical analysis. (MMP13 (n=5 mice): P=.08, IL-6 (n=4 mice): P=.16, ADAMTS4 (n=2 mice), Col10a1 (n=2 mice))

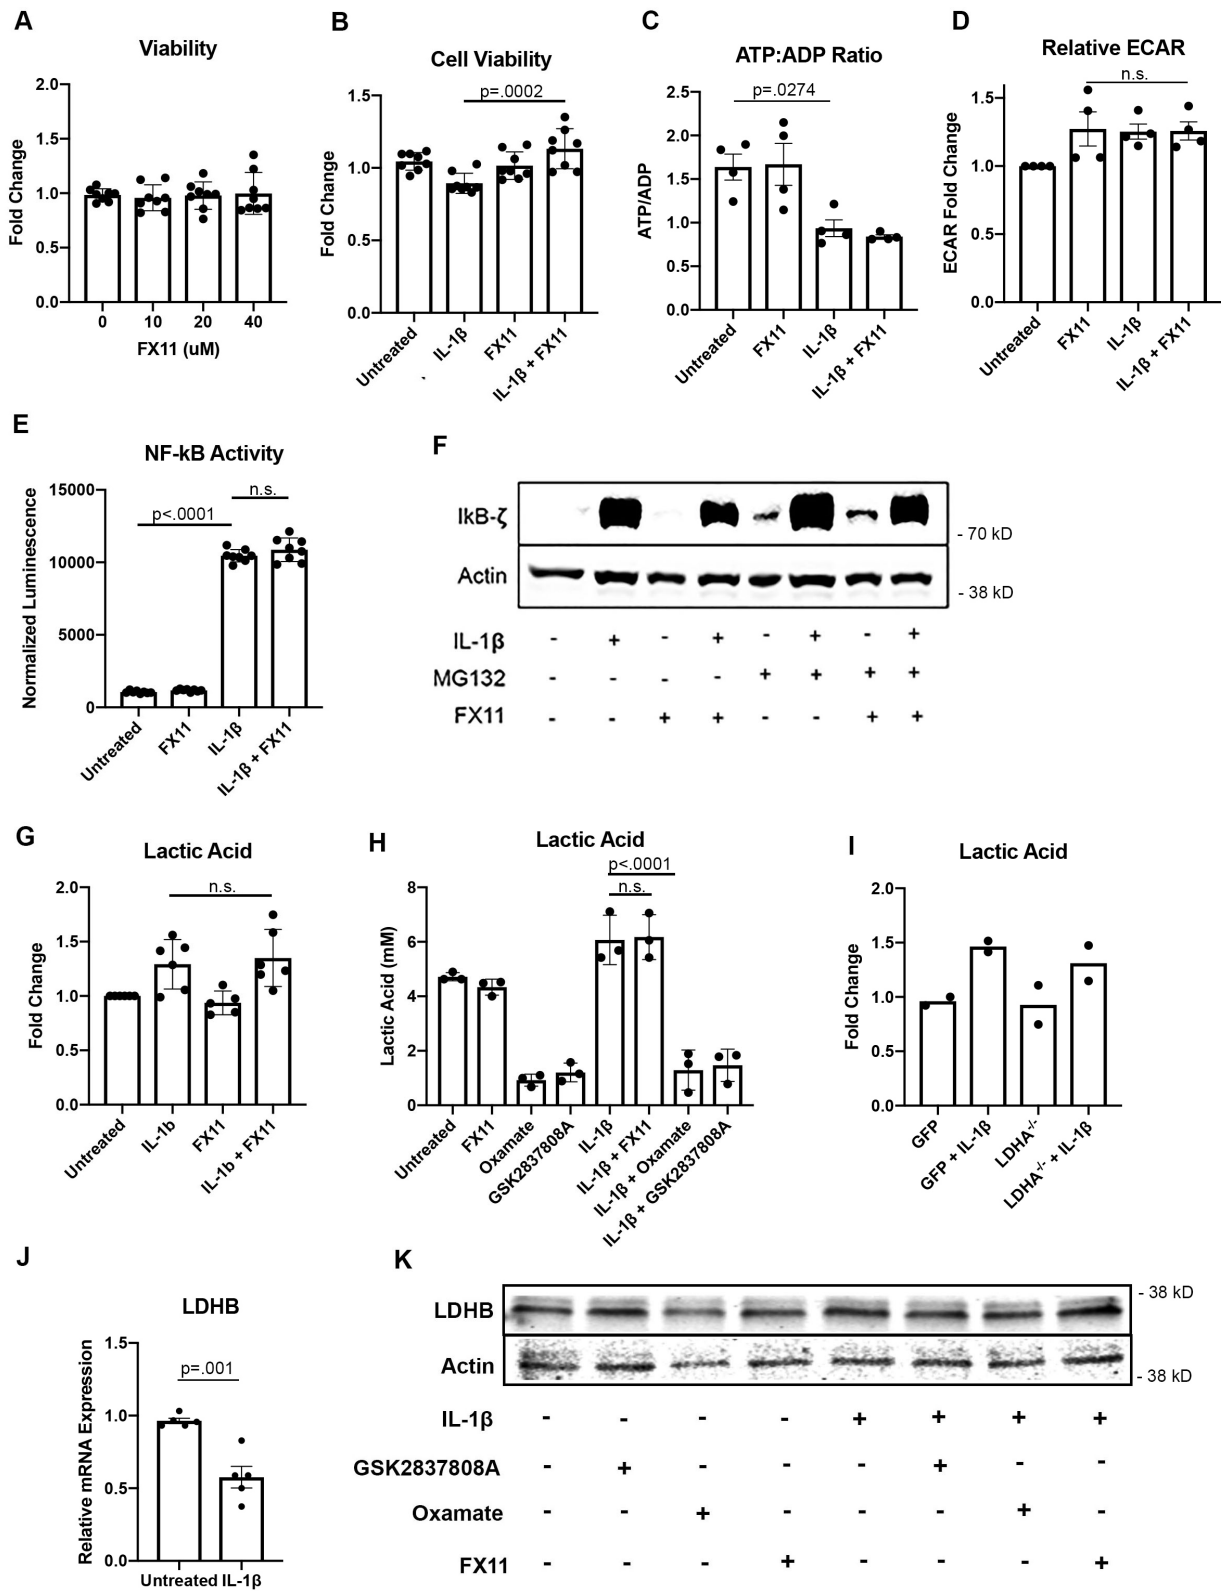

**Supplementary Figure 3. LDHA inhibition regulates inflammation independent of lactate production. (A-B)** MTT assay for viability was performed on chondrocytes treated with FX11 in the presence or absence of IL-1 $\beta$  for 24 hours. Bars represent mean  $\pm$  S.D. for n=6 replicates. **(C)** Chondrocytes were treated with IL-1 $\beta$  (10 ng/mL) in the presence or absence of FX11 (40  $\mu$ M) for 24 hours before ATP:ADP ratio was measured. Error bars represent mean  $\pm$  S.E.M. from n=4 biologically independent replicates. **(D)** Sternal chondrocytes were treated with IL-1 $\beta$  (10 ng/mL) and/or FX11 (40  $\mu$ M) for 48-72 hours prior to performing seahorse assay. ECAR was measured 10 minutes after start of assay. Error bars represent mean  $\pm$  S.E.M. from n=4 independent experiments. **(E)** Chondrocytes were isolated from NF- $\kappa$ B-Luciferase reporter mice. Luciferase measurement was performed on chondrocytes treated with IL-1 $\beta$  (10 ng/mL) in the presence or absence of FX11 (40  $\mu$ M) for 24 hours, normalized to protein. Data shown is mean  $\pm$  S.D. for n=8 replicates. **(F)** Primary chondrocytes were treated with IL-1 $\beta$  (10 ng/mL) for 24 hours in the presence or absence of FX11 (40  $\mu$ M) prior to 6 hour MG132 treatment. Immunoblotting was performed for I $\kappa$ B- $\zeta$ . **(G)** Chondrocytes were treated with IL-1 $\beta$  (10 ng/mL) in the presence or absence of FX11 (40  $\mu$ M) for 24 hours. Supernatant lactic acid was measured. Bars represent mean  $\pm$  S.E.M. for n=6 independent experiments. **(H)** Chondrocytes were treated with IL-1 $\beta$  (10 ng/mL) in the presence of GSK2837808A (10  $\mu$ M), oxamate (10 mM) or FX11 (40  $\mu$ M) for 24 hours for supernatant lactic acid measurement. Bars represent mean  $\pm$  S.D. from n=3 biological replicates. **(I)** LDHA<sup>ff</sup> chondrocytes were infected with adeno-GFP or adeno-cre, then treated with IL-1 $\beta$  (10 ng/mL) for 24 hours. Supernatant lactic acid was measured. Bars are mean of technical duplicates. **(J)** Chondrocytes were treated with IL-1 $\beta$  (10 ng/mL) for 24 hours. LDHB gene expression was measured, with bars displaying mean  $\pm$  S.E.M. from n=5 independent experiments. **(K)** Immunoblotting was performed for LDHB on samples treated with same conditions as in S3H. (A-E, G-I) One-way ANOVA followed by Tukey's multiple comparisons test. (J) Two-tailed student's T test. P values are noted in figure.

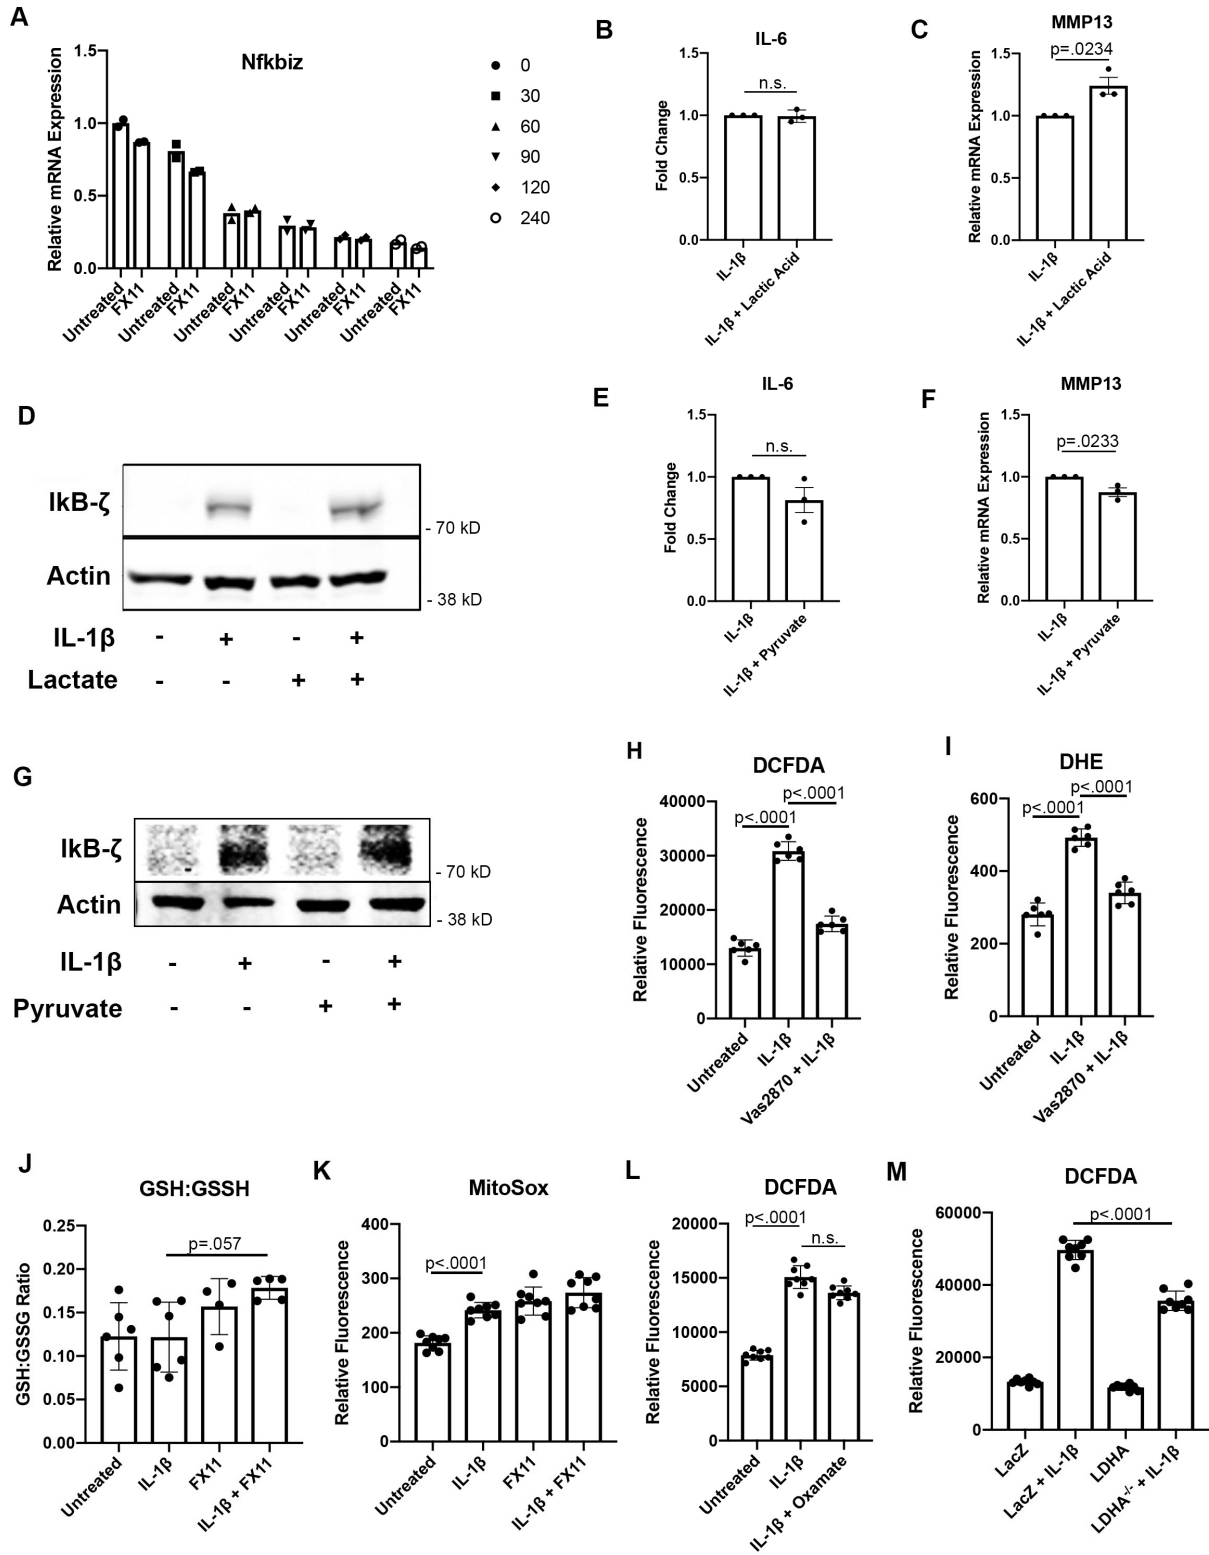

**Supplementary Figure 4. LDHA interaction with NADH propagates ROS. (A)** Chondrocytes were treated with IL-1 $\beta$  (10 ng/mL) in the presence or absence of FX11 (10



$\mu\text{M}$ ) for 24 hours, then treated with actinomycin D (6.5  $\mu\text{g}/\text{mL}$ ) for timepoints upto 4 hours. Gene expression of *Nfkbiz* was measured, with bars representing mean of technical duplicates. **(B-C)** Chondrocytes were treated with IL-1 $\beta$  (10  $\text{ng}/\text{mL}$ ) and/or lactic acid (500  $\mu\text{M}$ ) for 24 hours. Gene expression of IL-6 and MMP13 was measured normalized to IL-1 $\beta$  treatment with bars displaying mean  $\pm$  S.E.M. from  $n=3$  independent experiments. **(D)** Immunoblotting was performed under the same conditions for I $\kappa$ B- $\zeta$ , representative of one of three independent experiments. **(E-F)** Primary chondrocytes were treated with IL-1 $\beta$  (10  $\text{ng}/\text{mL}$ ) and/or pyruvate (10  $\text{mM}$ ) for 24 hours. Gene expression of IL-6 and MMP13 was measured, with bars displaying mean  $\pm$  S.E.M. from  $n=3$  independent experiments. **(G)** Immunoblotting was performed for I $\kappa$ B- $\zeta$  protein. **(H-I)** Chondrocytes were treated with IL-1 $\beta$  in the presence or absence of Vas2870 (50  $\mu\text{M}$ ) for 24 hours. DCFDA or DHE was utilized to measure ROS levels. Error bars represent mean  $\pm$  S.D. of  $n=8$  replicates. **(J)** Primary chondrocytes were treated with IL-1 $\beta$  (10  $\text{ng}/\text{mL}$ ) for 24 hours in the presence or absence of FX11 (40  $\mu\text{M}$ ). GSH and GSSH were measured biological replicates across 2 independent experiments. Bars display mean  $\pm$  S.D. for  $n=6$ . **(K)** Chondrocytes were treated with IL-1 $\beta$  (10  $\text{ng}/\text{mL}$ ) and/or FX11 (40  $\mu\text{M}$ ) for 24 hours. Mitochondrial ROS was measured using Mitosox. Error bars display mean  $\pm$  S.D. for  $n=8$  replicates. **(L)** Primary chondrocytes were treated with IL-1 $\beta$  (10  $\text{ng}/\text{mL}$ ) in the presence or absence of sodium oxamate (5  $\text{mM}$ ) for 24 hours. DCFDA assay was performed to measure intracellular ROS levels. Results represent one of three independent experiments, with error bars indicating mean  $\pm$  S.D. for  $n=8$  replicates. **(M)** *Ldha*<sup>fl/fl</sup> chondrocytes were infected with adeno-cre (LDHA<sup>-/-</sup>) or adeno-LacZ, followed by IL-1 $\beta$  treatment for 24 hours. DCFDA assay was performed with bars representing mean  $\pm$  S.D. from  $n=8$  replicates, representing one of three independent experiments. (B-C, E-F) Two-tailed student's T test. (H-M) One-way ANOVA followed by Tukey's multiple comparisons test. P values are noted in figure.

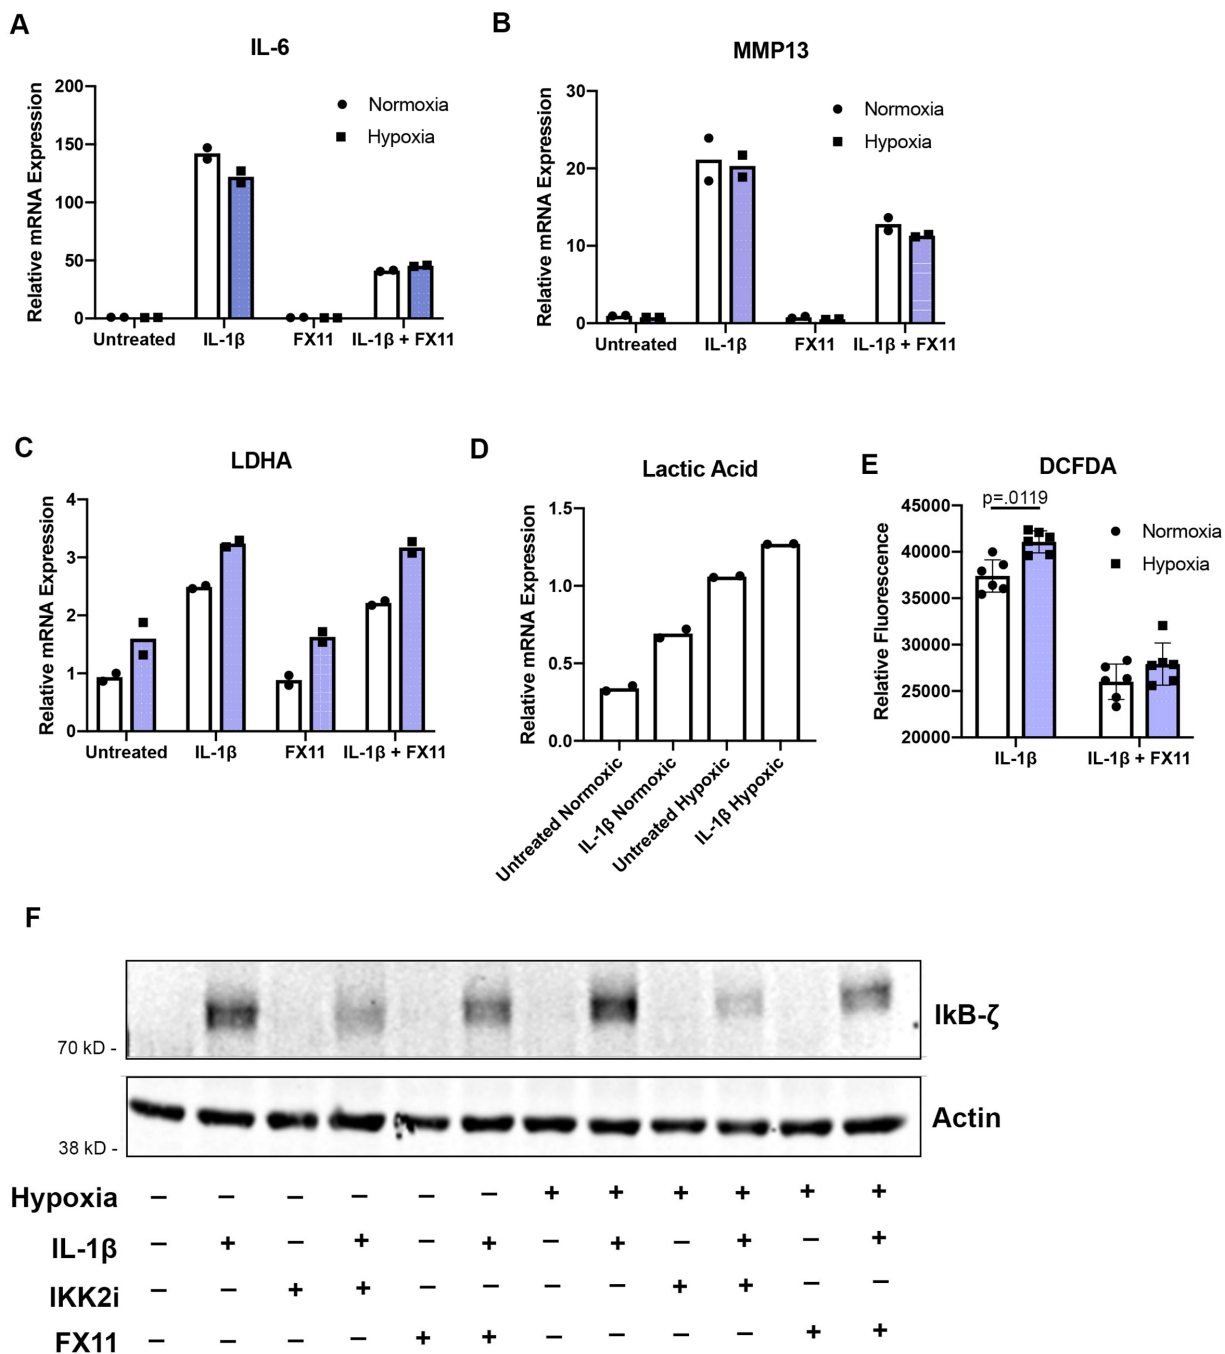

**Supplementary Figure 5. Chondrocytes under hypoxia behave similar to normoxic conditions.** (A) Chondrocytes were isolated from newborn pups and cultured in either 21% O<sub>2</sub> normoxic or 5% O<sub>2</sub> hypoxic conditions side by side. Cells were treated with IL-1 $\beta$  (10 ng/mL) in the presence or absence of FX11 (40  $\mu$ M) for 24 hours. (A-C) Gene expression of IL-6, MMP13 and LDHA were measured. Bars represent mean of two technical replicates, with data representative of one out of two independent experiments.

**(D)** Lactic acid levels in the supernatant were measured in technical duplicates, with bars representing mean. **(E)** Cellular ROS levels were measured using DCFDA fluorescent probe under the same conditions. Bars represent mean  $\pm$  S.D for n=6 replicates. Two-way ANOVA followed by Sidak's multiple comparisons test was utilized for statistical analysis. P values noted in figure. **(F)** Representative Western blot for I $\kappa$ B- $\zeta$  and actin from chondrocyte lysates treated as indicated under normoxic or hypoxic conditions, representative of one out of two independent experiments.

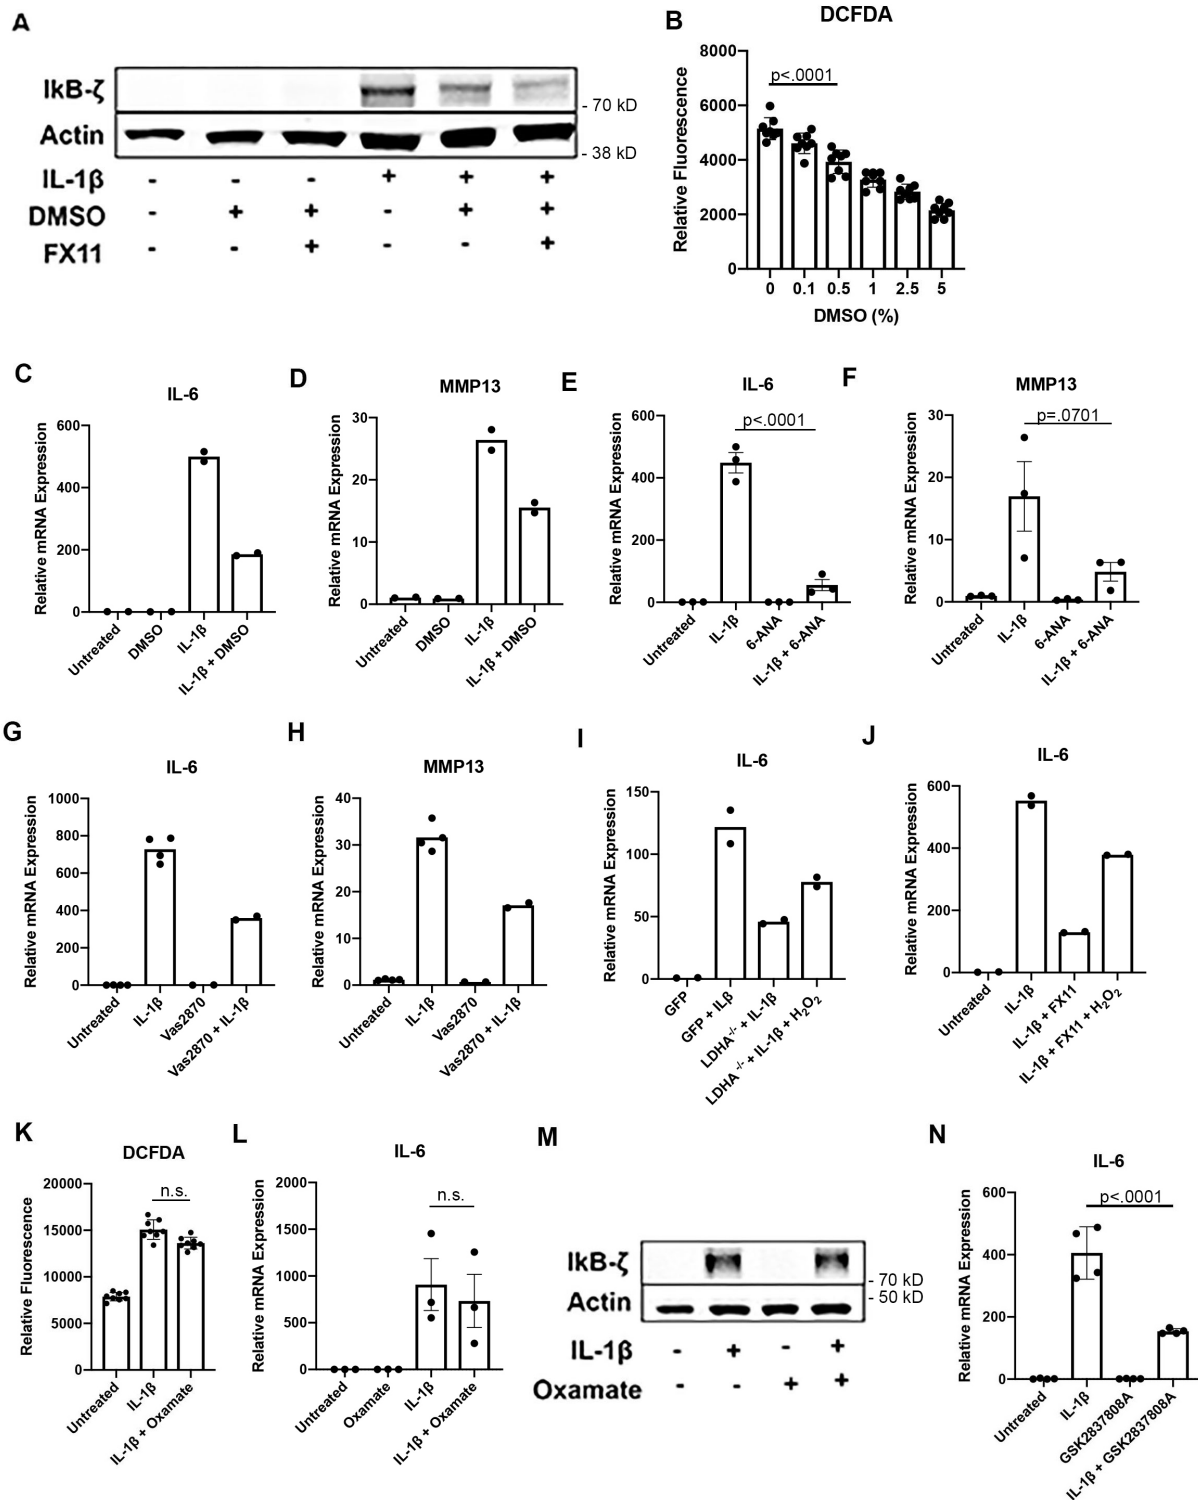

**Supplementary Figure 6. ROS regulates stability of IkB- $\zeta$  protein. (A)** Chondrocytes were treated with IL-1 $\beta$  and/or DMSO (1%) and FX11 (40  $\mu$ M) for 24 hours. Western blotting was performed for IkB- $\zeta$ . **(B)** Chondrocytes were treated with increasing

concentrations of DMSO for 24 hours. Intracellular ROS was measured by DCFDA assay. Bars represent mean  $\pm$  S.D. for n=8, representative of one out of two independent experiments. **(C-D)** Gene expression was measured on samples treated with IL-1 $\beta$  (10 ng/mL) and/or DMSO (1%). Bars are mean of technical duplicates from one representative experiment out of two. **(E-F)** Primary chondrocytes were treated with IL-1 $\beta$  (10 ng/mL) and/or 6-ANA (100  $\mu$ M) for 24 hours. Gene expression was measured by qPCR. Bars are mean  $\pm$  S.E.M. from n=3 independent experiments. **(G-H)** Primary chondrocytes were treated with IL-1 $\beta$  (10 ng/mL) in the presence or absence of Vas2870 (50  $\mu$ M) for 24 hours. Gene expression of IL-6 and MMP13 was measured with bars representing mean of technical replicates, representative of one of three independent experiments. **(I)** WT and LDHA<sup>-/-</sup> chondrocytes were treated with IL-1 $\beta$  and H<sub>2</sub>O<sub>2</sub> (50  $\mu$ M) for 24 hours. Gene expression of IL-6 was measured. Graph displays data from one representative experiment out of three, with bar representing mean of technical replicates. **(J)** Primary chondrocytes were treated with IL-1 $\beta$  (10 ng/mL) in the presence or absence of FX11 (40  $\mu$ M) and/or H<sub>2</sub>O<sub>2</sub> (50  $\mu$ M) for 24 hours. Gene expression of IL-6 was measured. Bar represents mean of technical replicates. **(K)** Primary chondrocytes were treated with IL-1 $\beta$  (10 ng/mL) and/or sodium oxamate (5 mM) for 24 hours. Intracellular ROS was measured by DCFDA assay, with bars representing mean  $\pm$  S.D. for n=8 replicates. **(L)** Gene expression of IL-6 was measured, graph displays mean  $\pm$  S.E.M. for n=3 independent experiments. **(M)** Western blotting was performed for I $\kappa$ B- $\zeta$  under these same conditions. **(N)** Primary chondrocytes were treated with IL-1 $\beta$  (10 ng/mL) in the presence or absence of GSK2837808A (10  $\mu$ M) for 24 hours. Gene expression of IL-6 was measured by qPCR for n=4 replicates. Bars represent mean  $\pm$  S.D. for n= 4 replicates. (B,E-F,K, L, N) One-way ANOVA followed by Tukey's multiple comparisons test. P values noted in figure.

### Supplementary Table 1: qPCR primer list

| Gene Name     | Primer Sequence                  |
|---------------|----------------------------------|
| Actin (Mouse) | F- 5'-CTAAGGCCAACCGTGAAAAG-3'    |
|               | R- 5'-ACCAGAGGCATACAGGGACA-3'    |
| IL-6 (Mouse)  | F- 5'-GAGGATACCACTCCCAACAGACC-3' |

|               |                                      |
|---------------|--------------------------------------|
|               | R- 5'-AAGTGCATCATCGTTGTTCATACA-3'    |
| MMP13 (Mouse) | F- 5'-GCCAGAACTTCCCAACCAT-3'         |
|               | R- 5'-TCAGAGCCCAGAATTTTCTCC-3'       |
| IL-6 (Human)  | F- 5'-CCAGCTATGAACTCCTTCTC-3'        |
|               | R- 5'-GCTTGTTCTCACATCTCTC-3'         |
| MMP13 (Human) | F- 5'-AATATCTGAACTGGGTCTTCCAAAA-3'   |
|               | R- 5'-CAGACCTGGTTTCTGAGAACAG-3'      |
| LDHA          | F- 5'-GGATGAGCTTGCCCTTGTGA-3'        |
|               | R- 5'-GACCAGCTTGAGTTCGCAGTTA-3'      |
| Glut1         | F-5'-TCTCTGTCGGCCTCTTTGTT-3'         |
|               | R- 5'-GCAGAAGGGCAACAGGATAC-3'        |
| IKK2          | F- 5'-CCGAAAGTGTGAGCTGTATC-3'        |
|               | R- 5'-CCTCAGCTGGAAGAAGGAGA-3'        |
| G6pd2         | F- 5'-CTGAATGAACGCAAAGCTGA-3'        |
|               | R- 5'-CAATCTTGTGCAGCAGTGGT-3'        |
| Gpi           | F- 5'-GTGGTCAGCCATTGGACTTT-3'        |
|               | R- 5'-CTTTCCGTTGGACTCCATGT-3'        |
| Rpia          | F- 5'-TGCAGCGAATAGCTGAAAGA-3'        |
|               | R- 5'-ACAGCCATTCGAAGTTCCAC-3'        |
| Prps1         | F- 5'-TTGATATCCCGGTGGACAAT-3'        |
|               | R- 5'-AGGGCCAGAAAAGATTCCAT-3'        |
| Aco2          | F- 5'-AATGGATGTACTCGTTGGGC-3'        |
|               | R- 5'-ACAGCCTACTGGTACTCGG-3'         |
| SDHA          | F- 5'-AACACTGGAGGAAGCACACC-3'        |
|               | R- 5'-AGTAGGAGCGGATAGCAGGA-3'        |
| NFKBIZ        | F- 5'-TCTCACTTCGTGACATCACC-3'        |
|               | R- 5'-GGTTGGTATTTCTGAGGTGGAG-3'      |
| NOX2          | F- 5'-CCCTTGGTACAGCCAGTGAAGAT-3'     |
|               | R- 5'-CAATCCCGGCTCCCACTAACATCA-3'    |
| NOX4          | F- 5'-GGATCACAGAAGTCCCTAGCAG-3'      |
|               | R- 5'-GCGGCTACATGCACACCTGAGAA-3'     |
| MCP-1         | F- 5'-CATCCACGTGTTGGCTCA-3'          |
|               | R- 5'-<br>GATCATCTTGCTGGTGAATGAGT-3' |
| ADAMTS4       | F- 5'-CTTCCTGGACAATGGTTATGG-3'       |
|               | R- 5'-GAAAAGTCGCTGGTAGATGGA-<br>3'   |
| LDHB          | F- 5'-AGTCTCCCGTGCATCCTCAA-3'        |

|                |                               |
|----------------|-------------------------------|
|                | R- 5'-AGGGTGTCCGCACTCTTCCT-3' |
| Actin (Human)  | F-5'-CTAACCGCGAGAAGATGA-3'    |
|                | R-5'-CCAGAGGCGTACAGGGATAG-3'  |
| NFKBIZ (Human) | F-5'-CCGTTTCCCTGAACACAGTT-3'  |
|                | R-5'-AGAAAAGACCTGCCCTCCAT-3'  |
| G6PD2 (Human)  | F-5'-AAGAACGTGAAGCTCCCTGA-3'  |
|                | R-5'-AATATAGGGGATGGGCTTGG-3'  |
