# Supplementary material for: LDHA-mediated ROS generation in chondrocytes is a potential therapeutic target for osteoarthritis
Source: PubMed Central journal article supplement (PMC7347613; doi:10.1038/s41467-020-17242-0), 2020-07-09
Supplement: 41467_2020_17242_MOESM3_ESM.pdf [file 41467_2020_17242_MOESM3_ESM.pdf]

## Description of Additional Supplementary Files

### Supplementary Data 1

**Description:** Differentially Expressed Genes from RNA Sequencing. Related to Figure 1. All differentially expressed genes from the RNAseq dataset that had a P-value less than or equal to 0.05
